# Supplementary material for: Region and species dependent mechanical properties of adolescent and young adult brain tissue
Source: PubMed Central journal article supplement (PMC5653834; doi:10.1038/s41598-017-13727-z), 2017-10-23
Supplement: 41598_2017_13727_MOESM1_ESM.pdf [file 41598_2017_13727_MOESM1_ESM.pdf]

# Region and species dependent mechanical properties of adolescent and young adult brain tissue

David B. MacManus<sup>1</sup> (david.mac-manus@ucdconnect.ie), Baptiste, Pierrat<sup>1,2,3</sup> (pierrat@emse.fr), Jeremiah G. Murphy<sup>4</sup> (jeremiah.murphy@dcu.ie), Michael D. Gilchrist<sup>1\*</sup> (michael.gilchrist@ucd.ie)

<sup>1</sup>School of Mechanical & Materials Engineering, University College Dublin, Ireland

<sup>2</sup>Ecole Nationale Supérieure des Mines de Saint-Etienne, CIS-EMSE, SAINBIOSE, F-42023 Saint Etienne, France

<sup>3</sup>INSERM, U1059, F-42000 Saint Etienne, France

<sup>4</sup>School of Mechanical & Manufacturing Engineering, Dublin City University, Ireland

\*Corresponding author: E: ([michael.gilchrist@ucd.ie](mailto:michael.gilchrist@ucd.ie)), T: +353 1 716 1890 F: +353 1 2830534

Cb = Cerebellum, Ctx = Cortex, Md = Medulla oblongata, Po = Pons, Th = Thalamus (sagittal plane), CRC = Corona Radiata (coronal plane), CCC = Corpus callosum (coronal plane), CCS = Corpus callosum (sagittal plane).  $\mu$  is the shear modulus (Pa) of the neo-Hookean based viscoelastic model,  $g_1$ ,  $g_2$ , and  $g_\infty$  are the reduced relaxation functions,  $t_1$  and  $t_2$  are the time constants in seconds.

|            |             | <b>6 week old mouse</b> |       |       |       |       |            |       |
|------------|-------------|-------------------------|-------|-------|-------|-------|------------|-------|
|            |             | $\mu$                   | $g_1$ | $t_1$ | $g_2$ | $t_2$ | $g_\infty$ | R2    |
| <b>Cbl</b> | <b>MEAN</b> | 2475                    | 0.492 | 0.021 | 0.221 | 0.304 | 0.287      | 0.977 |
|            | <b>STD</b>  | 390                     | 0.014 | 0.000 | 0.007 | 0.007 | 0.013      | 0.011 |
| <b>Ctx</b> | <b>MEAN</b> | 4831                    | 0.520 | 0.023 | 0.218 | 0.303 | 0.262      | 0.978 |
|            | <b>STD</b>  | 1012                    | 0.021 | 0.004 | 0.023 | 0.009 | 0.017      | 0.008 |
| <b>Md</b>  | <b>MEAN</b> | 3813                    | 0.553 | 0.020 | 0.221 | 0.278 | 0.225      | 0.977 |
|            | <b>STD</b>  | 860                     | 0.036 | 0.001 | 0.015 | 0.003 | 0.029      | 0.013 |
| <b>Po</b>  | <b>MEAN</b> | 5656                    | 0.593 | 0.022 | 0.209 | 0.278 | 0.198      | 0.980 |
|            | <b>STD</b>  | 1092                    | 0.025 | 0.002 | 0.010 | 0.003 | 0.023      | 0.013 |

| <b>10 weeks old mouse</b> |             |       |           |           |           |           |                             |           |
|---------------------------|-------------|-------|-----------|-----------|-----------|-----------|-----------------------------|-----------|
|                           |             | $\mu$ | <b>g1</b> | <b>t1</b> | <b>g2</b> | <b>t2</b> | <b>g<math>\infty</math></b> | <b>R2</b> |
| <b>Cbl</b>                | <b>MEAN</b> | 2807  | 0.536     | 0.022     | 0.209     | 0.328     | 0.255                       | 0.967     |
|                           | <b>STD</b>  | 544   | 0.026     | 0.002     | 0.010     | 0.028     | 0.030                       | 0.011     |
|                           |             |       |           |           |           |           |                             |           |
| <b>Ctx</b>                | <b>MEAN</b> | 6752  | 0.555     | 0.024     | 0.206     | 0.353     | 0.240                       | 0.963     |
|                           | <b>STD</b>  | 1736  | 0.024     | 0.001     | 0.011     | 0.004     | 0.023                       | 0.036     |
|                           |             |       |           |           |           |           |                             |           |
| <b>Md</b>                 | <b>MEAN</b> | 4651  | 0.584     | 0.024     | 0.200     | 0.353     | 0.216                       | 0.963     |
|                           | <b>STD</b>  | 714   | 0.022     | 0.001     | 0.011     | 0.003     | 0.019                       | 0.013     |
|                           |             |       |           |           |           |           |                             |           |
| <b>Po</b>                 | <b>MEAN</b> | 6564  | 0.599     | 0.021     | 0.206     | 0.351     | 0.196                       | 0.970     |
|                           | <b>STD</b>  | 1690  | 0.012     | 0.001     | 0.013     | 0.020     | 0.014                       | 0.009     |

| <b>12 weeks old mouse</b> |             |       |           |           |           |           |                             |           |
|---------------------------|-------------|-------|-----------|-----------|-----------|-----------|-----------------------------|-----------|
|                           |             | $\mu$ | <b>g1</b> | <b>t1</b> | <b>g2</b> | <b>t2</b> | <b>g<math>\infty</math></b> | <b>R2</b> |
| <b>Cbl</b>                | <b>MEAN</b> | 3142  | 0.508     | 0.025     | 0.203     | 0.299     | 0.290                       | 0.982     |
|                           | <b>STD</b>  | 1082  | 0.019     | 0.002     | 0.017     | 0.004     | 0.020                       | 0.004     |
|                           |             |       |           |           |           |           |                             |           |
| <b>Ctx</b>                | <b>MEAN</b> | 7668  | 0.553     | 0.026     | 0.202     | 0.396     | 0.246                       | 0.981     |
|                           | <b>STD</b>  | 478   | 0.012     | 0.004     | 0.003     | 0.032     | 0.010                       | 0.005     |
|                           |             |       |           |           |           |           |                             |           |
| <b>Md</b>                 | <b>MEAN</b> | 4317  | 0.571     | 0.022     | 0.203     | 0.283     | 0.227                       | 0.983     |
|                           | <b>STD</b>  | 566   | 0.017     | 0.000     | 0.006     | 0.002     | 0.015                       | 0.003     |
|                           |             |       |           |           |           |           |                             |           |
| <b>Po</b>                 | <b>MEAN</b> | 6509  | 0.621     | 0.018     | 0.201     | 0.284     | 0.178                       | 0.980     |
|                           | <b>STD</b>  | 1514  | 0.032     | 0.001     | 0.019     | 0.003     | 0.025                       | 0.010     |

| <b>20-25 week old rat</b> |             |       |           |           |           |           |                             |           |
|---------------------------|-------------|-------|-----------|-----------|-----------|-----------|-----------------------------|-----------|
|                           |             | $\mu$ | <b>g1</b> | <b>t1</b> | <b>g2</b> | <b>t2</b> | <b>g<math>\infty</math></b> | <b>R2</b> |
| <b>Cbl</b>                | <b>MEAN</b> | 2611  | 0.515     | 0.020     | 0.187     | 0.302     | 0.298                       | 0.971     |
|                           | <b>STD</b>  | 497   | 0.031     | 0.001     | 0.016     | 0.003     | 0.021                       | 0.009     |
| <b>Ctx</b>                | <b>MEAN</b> | 5715  | 0.534     | 0.020     | 0.207     | 0.304     | 0.258                       | 0.980     |
|                           | <b>STD</b>  | 2089  | 0.030     | 0.001     | 0.013     | 0.011     | 0.021                       | 0.007     |
| <b>Md</b>                 | <b>MEAN</b> | 4602  | 0.620     | 0.019     | 0.176     | 0.280     | 0.204                       | 0.974     |
|                           | <b>STD</b>  | 1736  | 0.036     | 0.002     | 0.016     | 0.034     | 0.027                       | 0.010     |
| <b>Po</b>                 | <b>MEAN</b> | 4933  | 0.643     | 0.018     | 0.173     | 0.299     | 0.184                       | 0.977     |
|                           | <b>STD</b>  | 1005  | 0.034     | 0.002     | 0.016     | 0.016     | 0.026                       | 0.007     |

| <b>22 week old pig</b> |             |       |           |           |           |           |                             |           |
|------------------------|-------------|-------|-----------|-----------|-----------|-----------|-----------------------------|-----------|
|                        |             | $\mu$ | <b>g1</b> | <b>t1</b> | <b>g2</b> | <b>t2</b> | <b>g<math>\infty</math></b> | <b>R2</b> |
| <b>Cbl</b>             | <b>MEAN</b> | 2827  | 0.504     | 0.017     | 0.169     | 0.302     | 0.327                       | 0.959     |
|                        | <b>STD</b>  | 631   | 0.032     | 0.001     | 0.015     | 0.002     | 0.039                       | 0.012     |
| <b>Ctx</b>             | <b>MEAN</b> | 3200  | 0.496     | 0.019     | 0.167     | 0.295     | 0.337                       | 0.953     |
|                        | <b>STD</b>  | 565   | 0.041     | 0.001     | 0.023     | 0.004     | 0.059                       | 0.023     |
| <b>Md</b>              | <b>MEAN</b> | 5307  | 0.532     | 0.018     | 0.201     | 0.246     | 0.267                       | 0.979     |
|                        | <b>STD</b>  | 1673  | 0.031     | 0.001     | 0.006     | 0.025     | 0.032                       | 0.007     |
| <b>Po</b>              | <b>MEAN</b> | 6192  | 0.518     | 0.017     | 0.196     | 0.263     | 0.286                       | 0.977     |
|                        | <b>STD</b>  | 2235  | 0.062     | 0.002     | 0.009     | 0.007     | 0.068                       | 0.010     |
| <b>Th</b>              | <b>MEAN</b> | 2806  | 0.524     | 0.021     | 0.200     | 0.281     | 0.276                       | 0.969     |
|                        | <b>STD</b>  | 288   | 0.028     | 0.003     | 0.012     | 0.005     | 0.025                       | 0.014     |
| <b>CR</b>              | <b>MEAN</b> | 5623  | 0.634     | 0.017     | 0.187     | 0.262     | 0.179                       | 0.975     |
|                        | <b>STD</b>  | 988   | 0.028     | 0.001     | 0.013     | 0.002     | 0.020                       | 0.009     |
| <b>CCC</b>             | <b>MEAN</b> | 5344  | 0.611     | 0.021     | 0.196     | 0.283     | 0.193                       | 0.977     |
|                        | <b>STD</b>  | 1358  | 0.027     | 0.001     | 0.008     | 0.003     | 0.023                       | 0.006     |

|            |             |      |       |       |       |       |       |       |
|------------|-------------|------|-------|-------|-------|-------|-------|-------|
| <b>CCS</b> | <b>MEAN</b> | 4894 | 0.560 | 0.018 | 0.189 | 0.273 | 0.251 | 0.969 |
|            | <b>STD</b>  | 983  | 0.051 | 0.002 | 0.009 | 0.010 | 0.052 | 0.007 |

Experimental parameters, number of indentations per region and age group

| <b>Age (weeks)</b> | <b>Cerebellum</b> | <b>Cortex</b> | <b>Medulla</b> | <b>Pons</b> |
|--------------------|-------------------|---------------|----------------|-------------|
| <b>6</b>           | 15                | 15            | 16             | 23          |
| <b>10</b>          | 30                | 30            | 30             | 30          |
| <b>12</b>          | 10                | 10            | 11             | 11          |
